# Supplementary material for: Sleep-Disordered Breathing and Prognosis after Ischemic Stroke: It Is Not Apnea-Hypopnea Index That Matters
Source: MDPI journal article supplement (doi:10.3390/diagnostics13132246), 2023-07-03
Supplement: s1 [file s1]

# 0Supplementary Materials: Sleep-disordered breathing and prognosis after ischemic stroke: it is not apnea-hypopnea index that matters

Lyudmila Korostovtseva <sup>1,\*</sup>, Mikhail Bochkarev <sup>1</sup>, Valeria Amelina <sup>1,2</sup>, Uliana Nikishkina <sup>3</sup>, Sofia Osipenko <sup>1,3</sup>, Anastasia Vasilieva <sup>1</sup>, Vladislav Zheleznyakov <sup>1</sup>, Ekaterina Zabroda <sup>1,4</sup>, Alexey Gordeev <sup>1,4</sup>, Maria Golovkova-Kucheryavaia <sup>1</sup>, Stanislav Yanishevskiy <sup>1</sup>, Yurii Sviryaev <sup>1</sup> and Aleksandra Konradi <sup>1</sup>

## A subanalysis of the subgroup with previous stroke.

The patients with previous stroke did not differ from the whole cohort by sex ( $p=0.89$ ), age ( $p=0.89$ ), stroke subtype ( $p=0.96$ ), cerebral artery involvement ( $p=0.06$ ), NIHSS at admission ( $p=0.23$ ) and at discharge ( $p=0.087$ ), as well as by nocturnal respiratory parameters ( $p>0.05$  for all measures). At the same time, thrombolytic therapy was administered less frequently in patients with previous stroke compared to those experiencing their first-ever stroke: 5 (5.4%) versus 26 (13.9%),  $\chi^2=4.587$ ,  $p=0.022$ . With regard to comorbidities, almost all patients with previous stroke were hypertensive: 91 (97.8%) versus 171 (91.4%) ( $\chi^2=4.237$ ,  $p=0.040$ ). Other comorbidities were registered with equal frequency in patients with and without previous stroke.

**Table S1.** Characteristics of the patients with previous stroke.

| Parameter                                   | Total (n=93) | Patients with poor survival (n=21) | Patients free of events (n=72) | p-level                    |
|---------------------------------------------|--------------|------------------------------------|--------------------------------|----------------------------|
| <b>Clinical and demographic parameters</b>  |              |                                    |                                |                            |
| Sex (m), n (%)                              | 54 (58.1%)   | 14 (66.7%)                         | 40 (55.6%)                     | $\chi^2=0.824$ , $p=0.36$  |
| Age, years                                  | 66.2±10.2    | 69.9±10.9                          | 65.1±9.8                       | $p=0.048$                  |
| HTN, n (%)                                  | 91 (97.8%)   | 21 (100%)                          | 70 (97.2%)                     | $\chi^2=0.596$ , $p=0.44$  |
| HTN crisis, n (%)                           | 35 (10.7%)   | 5 (7.7%)                           | 30 (11.4%)                     | $\chi^2=1.667$ , $p=0.20$  |
| AF, n (%)                                   | 27 (29%)     | 9 (42.9%)                          | 18 (25%)                       | $\chi^2=2.516$ , $p=0.11$  |
| CAD, n (%)                                  | 50 (53.8%)   | 14 (66.7%)                         | 36 (50%)                       | $\chi^2=1.817$ , $p=0.18$  |
| Previous MI, n (%)                          | 21 (22.6%)   | 8 (38.1%)                          | 13 (18.1%)                     | $\chi^2=3.735$ , $p=0.053$ |
| Diabetes mellitus, n (%)                    | 28 (30.1%)   | 7 (33.3%)                          | 21 (29.2%)                     | $\chi^2=0.134$ , $p=0.71$  |
| Obesity, n (%)                              | 23 (24.7%)   | 6 (28.6%)                          | 17 (23.6%)                     | $\chi^2=0.215$ , $p=0.64$  |
| <b>Stroke characteristics</b>               |              |                                    |                                |                            |
| <b>TOAST classification (p=0.56)</b>        |              |                                    |                                |                            |
| Atherothrombotic                            | 15 (16.1%)   | 3 (14.30%)                         | 12 (16.7%)                     |                            |
| Cardioembolic                               | 30 (32.3%)   | 7 (33.3%)                          | 23 (31.9%)                     |                            |
| Small-vessel disease                        | 12 (12.9%)   | 1 (4.8%)                           | 11 (15.3%)                     |                            |
| Other determined etiology                   | 1 (1.1%)     | 0                                  | 1 (1.4%)                       |                            |
| Undetermined etiology                       | 35 (37.6%)   | 10 (47.6%)                         | 25 (34.7%)                     |                            |
| <b>Affected cerebral artery (p=0.88)</b>    |              |                                    |                                |                            |
| Vertebrobasilar (posterior cerebral artery) | 16 (17.2%)   | 4 (19.1%)                          | 12 (16.7%)                     |                            |
| Anterior cerebral artery                    | 1 (1.1%)     | 0                                  | 1 (1.1%)                       |                            |
| Median cerebral artery                      | 68 (73.1%)   | 15 (71.4%)                         | 53 (73.6%)                     |                            |
| Several arteries                            | 8 (8.6%)     | 2 (9.5%)                           | 6 (8.3%)                       |                            |
| <b>Medical interventions</b>                |              |                                    |                                |                            |
| Thrombolytic therapy, n                     | 5 (5.4%)     | 1 (4.8%)                           | 4 (5.6%)                       | $\chi^2=0.020$ , $p=0.89$  |

|                                                                              |                   |                   |                   |                           |
|------------------------------------------------------------------------------|-------------------|-------------------|-------------------|---------------------------|
| (%)                                                                          |                   |                   |                   |                           |
| Emergency stroke-related vascular surgery                                    | 18 (19.4%)        | 5 (23.8%)         | 13 (18.1%)        | $\chi^2=0.345$ , $p=0.56$ |
| NIHSS baseline, score                                                        | 4 (1; 25)         | 6 (1; 25)         | 4 (1; 25)         | 0.031                     |
| NIHSS baseline $\geq 5$ scores, n (%)                                        | 53 (57%)          | 15 (71.4%)        | 38 (52.8%)        | $\chi^2=2.96$ , $p=0.085$ |
| NIHSS discharge, score                                                       | 3 (0; 23)         | 3 (0; 23)         | 3 (0; 19)         | 0.34                      |
| <b>Respiratory parameters</b>                                                |                   |                   |                   |                           |
| AHI, episodes/h                                                              | 13.9 (0.0; 86.5)  | 11.2 (0.6; 54.1)  | 15.9 (0.0; 86.5)  | 0.51                      |
| ODI, episodes/h                                                              | 10.5 (0.0; 79.3)  | 7.4 (1.2; 45.1)   | 13.7 (0.0; 79.3)  | 0.083                     |
| Respiratory rate at night, breaths/min                                       | 15.9 (11.2; 29.0) | 16.6 (11.4; 27.8) | 15.7 (11.2; 29.0) | 0.78                      |
| Average SpO <sub>2</sub> , %                                                 | 92.7 (84.6; 97.4) | 92.6 (86.4; 96.8) | 92.8 (84.6; 97.4) | 0.77                      |
| Average desaturation drop, %                                                 | 3.85 (1.3; 9.4)   | 4.1 (3.2; 7.1)    | 3.8 (2.5; 9.3)    | 0.11                      |
| SpO <sub>2</sub> <90%, percent of total analyzed time                        | 5.1 (0.0; 87.9)   | 6.2 (0.0; 31)     | 2.0 (0.0; 87.9)   | 0.29                      |
| SDB (AHI $\geq 5$ /h), n (%)                                                 | 67 (72%)          | 13 (61.9%)        | 54 (75.0%)        | $\chi^2=1.384$ , $p=0.24$ |
| Hypoxemia (SpO <sub>2</sub> <90%) $\geq 2.1\%$ of total analyzed time, n (%) | 49 (52.6%)        | 15 (53.6%)        | 35 (47.2%)        |                           |
| Average desaturation drop $\geq 3.65\%$ , n (%)                              | 53 (57%)          | 14 (66.6%)        | 39 (54.2%)        | $\chi^2=2.511$ , $p=0.11$ |

The survival rate was poorer in patients with a higher nocturnal hypoxemia burden (SpO<sub>2</sub> <90 % during  $\geq 2.1\%$  of total analyzed time)—29.2 (21.9; 36.4) months compared to 38.0 (33.8; 42.1) months in those with a lower nocturnal hypoxemia burden (SpO<sub>2</sub> <90 % during <2.1% of total analyzed time) (Log Rank 5.366,  $p=0.021$ ) (Fig. 1S).

No difference was found between groups with higher ( $\geq 3.65\%$ ) versus lower (<3.65%) desaturation drops during night: 40.4 (34.1; 46.7) versus 32.2 (25.6; 38.8) months (Log Rank 1.859,  $p=0.173$ ).

The survival rate did not differ depending on the presence of SDB (AHI <5 versus AHI  $\geq 5$ /h): 23.5 (16.1; 30.8) versus 36.2 (30.7; 41.7) months (Log Rank 2.840,  $p=0.092$ ).

In a multivariable Cox proportional hazards regression (backward stepwise analysis) model, only age was associated with survival time, while the parameters of hypoxemia burden had borderline significance (Table 2 Suppl).

**Table S2.** Factors associated with poor outcome (based on Cox proportional hazard regression models).

| Model<br>(incl. hypoxemia time <2.1% versus $\geq 2.1\%$ nocturnal time) |                       |         |
|--------------------------------------------------------------------------|-----------------------|---------|
| Parameter                                                                | HR (95%CI)            | p-level |
| Age                                                                      | 1.082 (1.020; 1.147)  | 0.008   |
| Sex (male)                                                               | excl                  | 0.234   |
| Thrombolytic therapy (yes)                                               | excl                  | 0.598   |
| Emergency vascular intervention (yes)                                    | excl                  | 0.803   |
| Coronary artery disease (yes)                                            | excl                  | 0.613   |
| Diabetes mellitus (yes)                                                  | excl                  | 0.237   |
| NIHSS at admission                                                       | excl                  | 0.085   |
| SpO <sub>2</sub> <90% during $\geq 2.1\%$ of total analyzed time         | 3.360 (0.930; 12.146) | 0.065   |

Cox proportional hazard regression models with stepwise exclusion. Excl—factor excluded from the model.

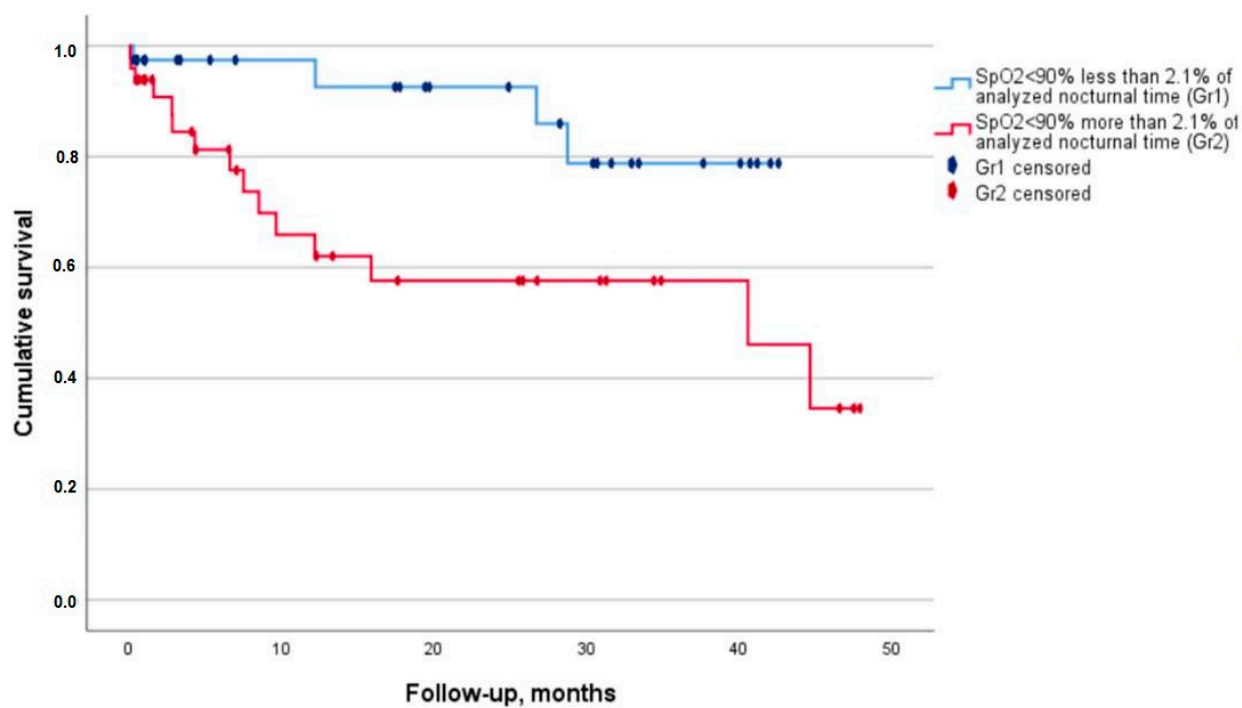

**Figure S1.** Survival (Kaplan–Meier curves) depending on the hypoxemia burden in patients with previous stroke.
